# Supplementary material for: Efficient hypochlorous acid (HClO) productionviaphotoelectrochemical solar energy conversion using a BiVO4-based photoanode
Source: Royal Society of Chemistry journal article supplement (doi:10.1039/c7se00453b), 2017-10-11
Supplement: c7se00453b1.pdf [file c7se00453b1.pdf]

## **Supplementary Information**

# **Efficient Hypochlorous Acid (HClO) Production *via* Photoelectrochemical Solar Energy Conversion Using a BiVO<sub>4</sub>-based photoanode**

### **Corresponding author**

Dr. Shoji IGUCHI and Dr. Kazuhiro SAYAMA

National Institute of Advanced Industrial Science and Technology (AIST), Japan

Tel: +81-29-861-4760, Fax: +81-29-861-4760

E-mail address: s.iguchi@aist.go.jp

### **List of the authors**

Shoji IGUCHI, Yugo MISEKI, and Kazuhiro SAYAMA

### **Affiliation and full postal address**

Advanced Functional Materials Team, Research Center for Photovoltaics (RCPV),

National Institute of Advanced Industrial Science and Technology (AIST), Central 5,

1-1-1 Higashi, Tsukuba, Ibaraki, 305-8565 Japan.

Tel: +81-29-861-4760, Fax: +81-29-861-4760

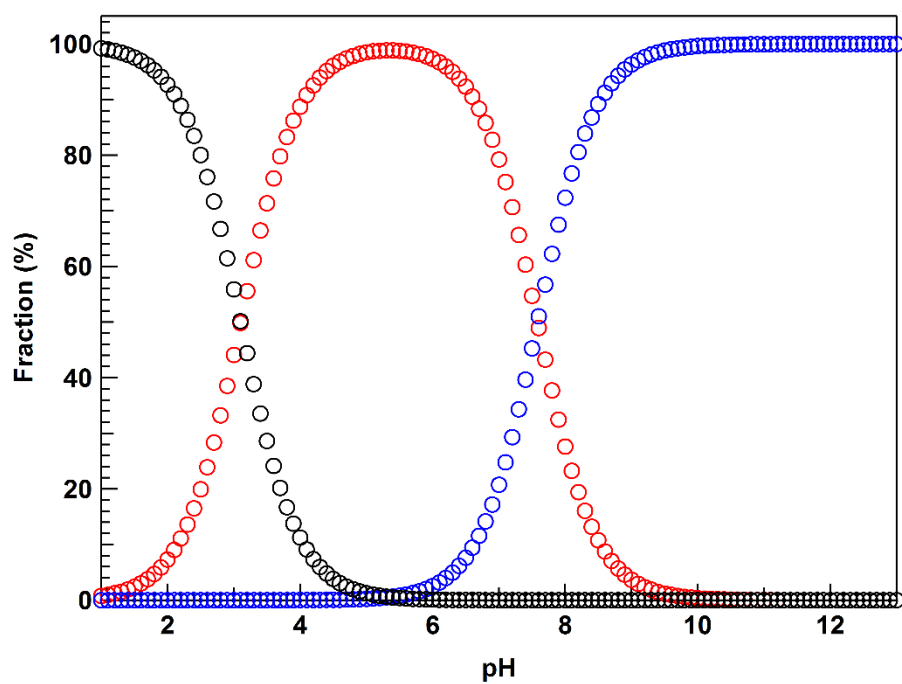

**Figure S1** Molar fraction of  $\text{Cl}_2$  (black),  $\text{HClO}$  (red), and  $\text{ClO}^-$  (blue) plotted versus pH of an aqueous solution based on *Eq.1* and *2* (equations are presented in the main text).  $[\text{Cl}_2] + [\text{HClO}] + [\text{ClO}^-] = 0.01 \text{ M}$ .  $[\text{Cl}^-] = 0.5 \text{ M}$ .

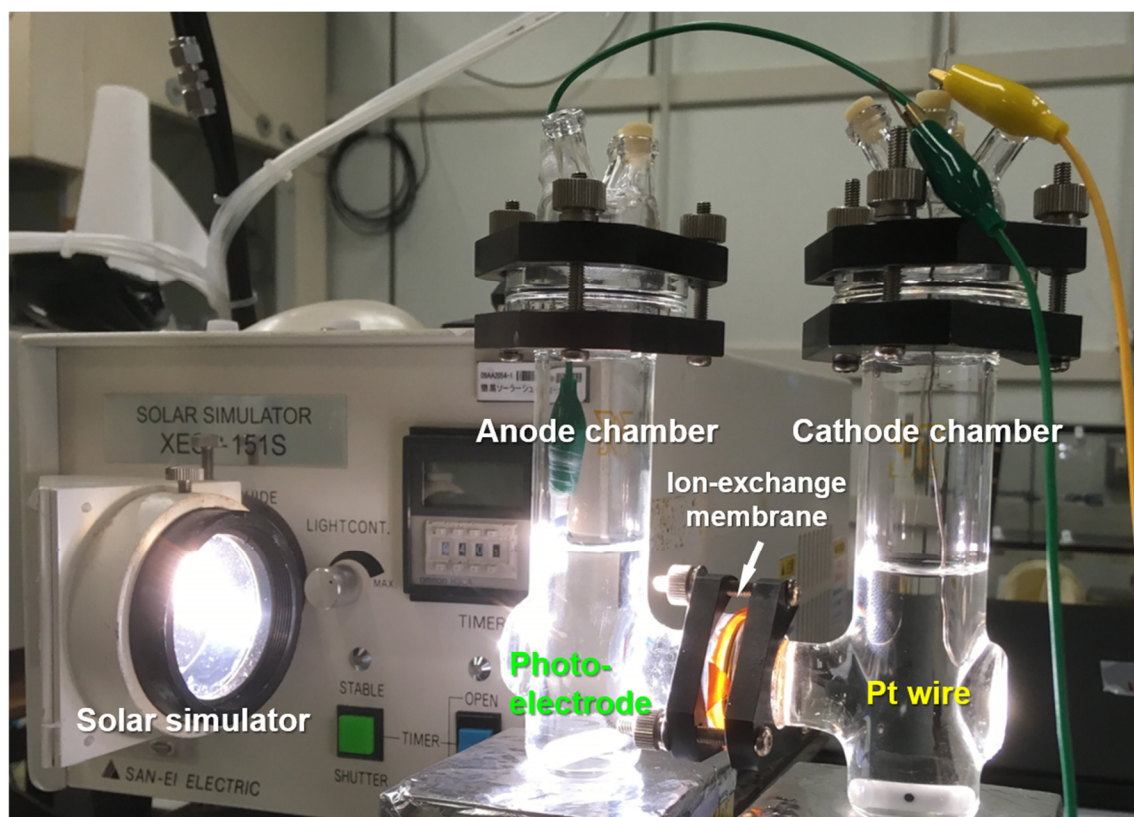

**Figure S2** Photograph of experimental setup for the photoelectrochemical HClO production under simulated solar light irradiation.

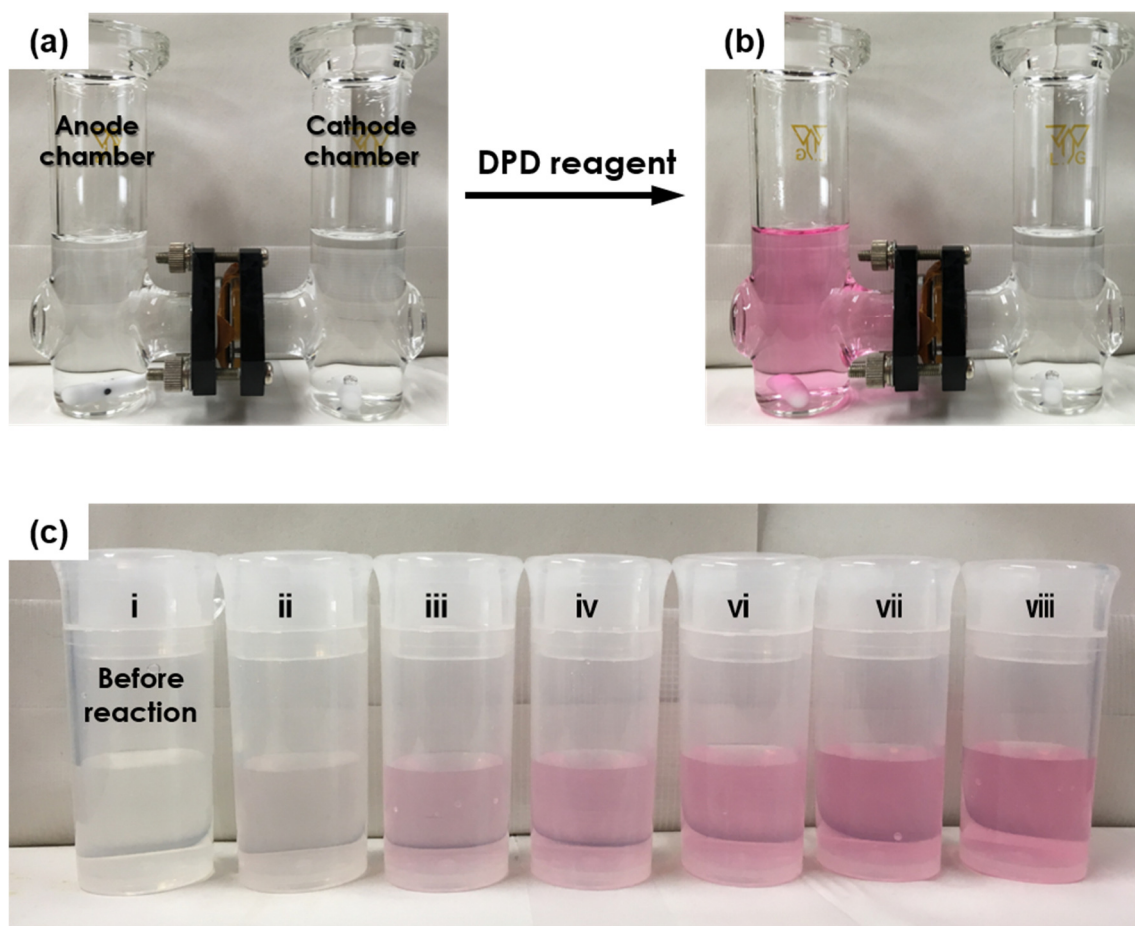

**Figure S3** Change in colour of the analyte solution containing the produced  $\text{HClO}$  by adding the DPD reagent. (a) before adding the DPD reagent (after the photoelectrochemical reaction). (b) analyte solution was changed into pale red by adding the DPD reagent. (c) colour of the analyte solution after adding the DPD reagent gradually became deeper with the photoirradiation (before the reaction (i), and during the reaction (ii) ~ (viii)).

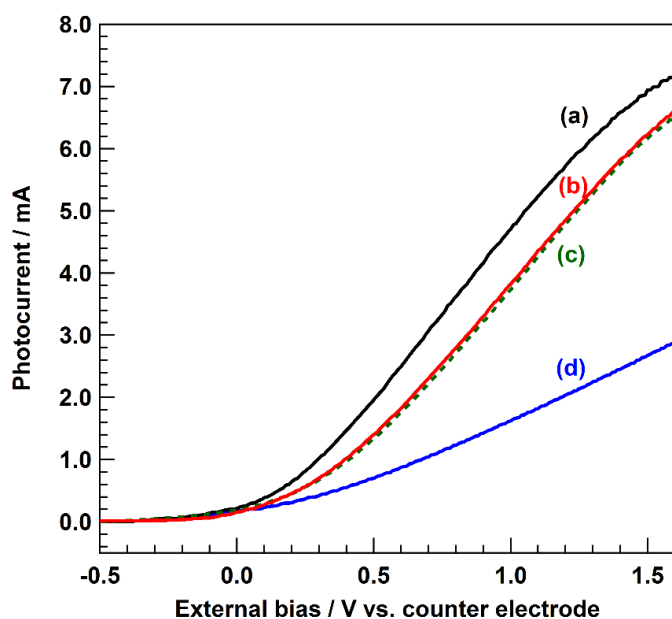

**Figure S4** I-V curves of BiVO<sub>4</sub>/WO<sub>3</sub>/FTO photoelectrode measured in (a) 0.5 M NaCl, (b) 0.1 M NaCl + 0.4 M NaClO<sub>4</sub>, (c) 0.5 M NaClO<sub>4</sub>, and (d) 0.1 M NaCl aqueous solution. Light source: simulated solar light (AM 1.5) with L-42 cut off filter, anode chamber: Air atmosphere, cathode chamber: O<sub>2</sub> atmosphere, irradiation area: ca. 4.0 cm<sup>2</sup>.

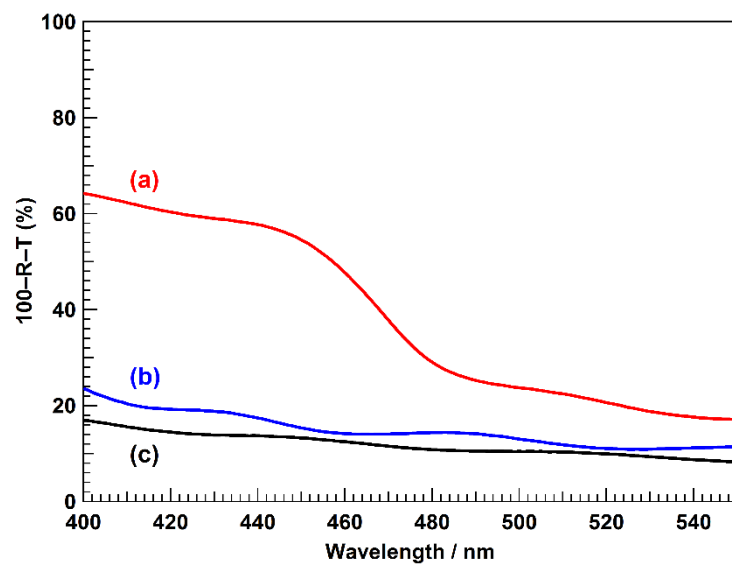

**Figure S5** Absorption spectra of (a) BiVO<sub>4</sub>/WO<sub>3</sub>/FTO, (b) WO<sub>3</sub>/FTO, and (c) bare FTO substrate. R: reflectance, T: transmittance.

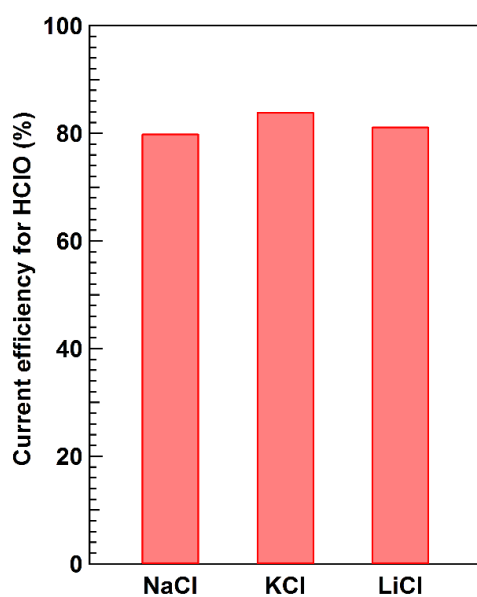

**Figure S6** Current efficiency for HClO production ( $\eta_{\text{HClO}}$ ) in the photoelectrochemical  $\text{Cl}^-$  oxidation using  $\text{BiVO}_4/\text{WO}_3/\text{FTO}$  photoanode. Concentration of electrolyte: 0.5, light source: simulated solar light (AM 1.5) with L-42 cut off filters, stable anodic current: 0.5 mA, photoirradiation time: 1000 s, anode chamber: air atmosphere, cathode chamber:  $\text{O}_2$  atmosphere, irradiation area: ca.  $4.0 \text{ cm}^2$ .

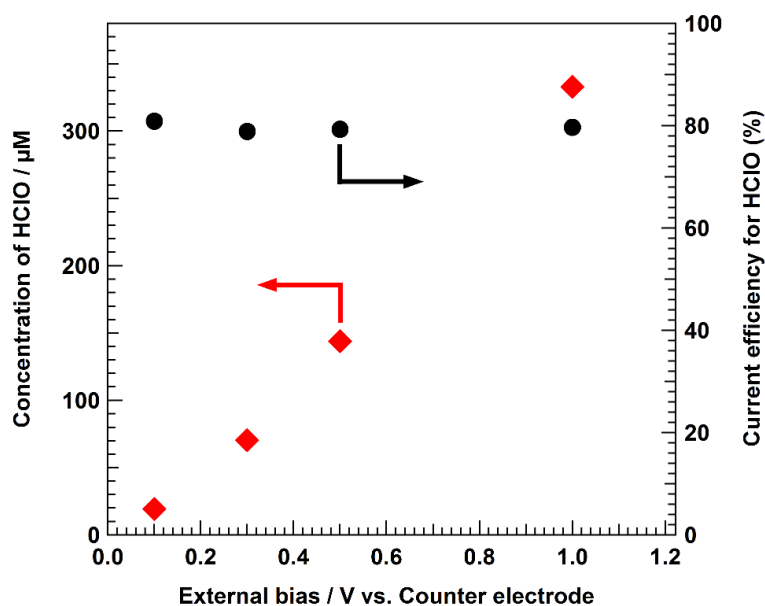

**Figure S7** External bias dependence on the concentration of HClO produced in the electrolyte solution ( $C_{\text{HClO}}$ , left axis) and the current efficiency for HClO production ( $\eta_{\text{HClO}}$ , right axis) in the photoelectrochemical  $\text{Cl}^-$  oxidation using  $\text{BiVO}_4/\text{WO}_3/\text{FTO}$  photoanode. Electrolyte: 5.0 M NaCl, light source: simulated solar light (AM 1.5) with L-42 cut off filters, photoirradiation time: 600 s, anode chamber: air atmosphere, cathode chamber:  $\text{O}_2$  atmosphere, irradiation area: ca.  $4.0 \text{ cm}^2$ .



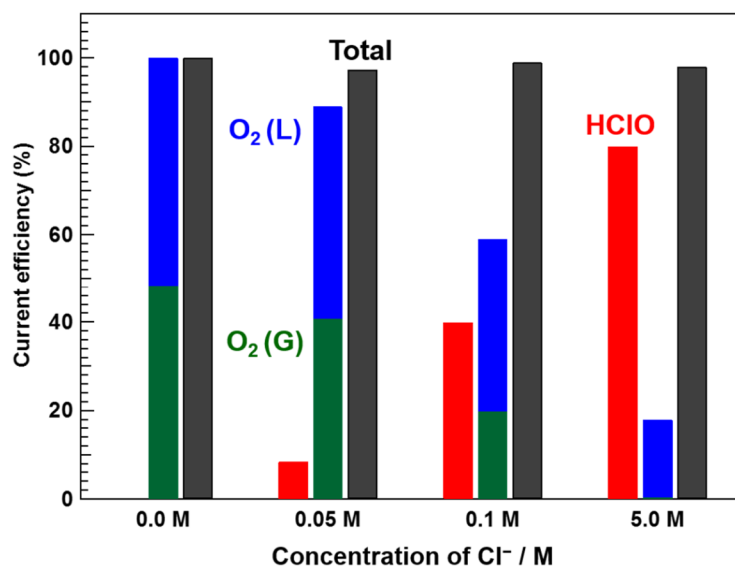

**Figure S8** Current efficiency for HClO (red), O<sub>2</sub> in gas phase (green), and O<sub>2</sub> dissolved in the electrolyte solution (blue) in the photoelectrochemical Cl<sup>-</sup> oxidation using BiVO<sub>4</sub>/WO<sub>3</sub>/FTO photoanode. Amount of O<sub>2</sub> evolved was determined by using O<sub>2</sub> sensor (Optical Oxygen Meter, FireStingO<sub>2</sub>, pyro science). Total current efficiency is the sum of HClO, O<sub>2</sub> in gas phase, and O<sub>2</sub> dissolved in the electrolyte solution. In the case of 0.0 M NaCl concentration, NaH<sub>2</sub>PO<sub>4</sub> aqueous solution was used as the electrolyte solution.
